# Supplementary material for: Gold clusters showing pentagonal atomic arrays revealed by aberration-corrected scanning transmission electron microscopy
Source: Royal Society of Chemistry journal article supplement (doi:10.1039/c0cc02983a), 2010-01-01

### Supplementary information

The following supplementary information contains the intensity profile from figure 4a and the raw and filtered data of the images presented along the manuscript.

Intensity profiles obtained from the cluster (red rectangle) in comparison with the profile extracted from the Au atom marked by an arrow

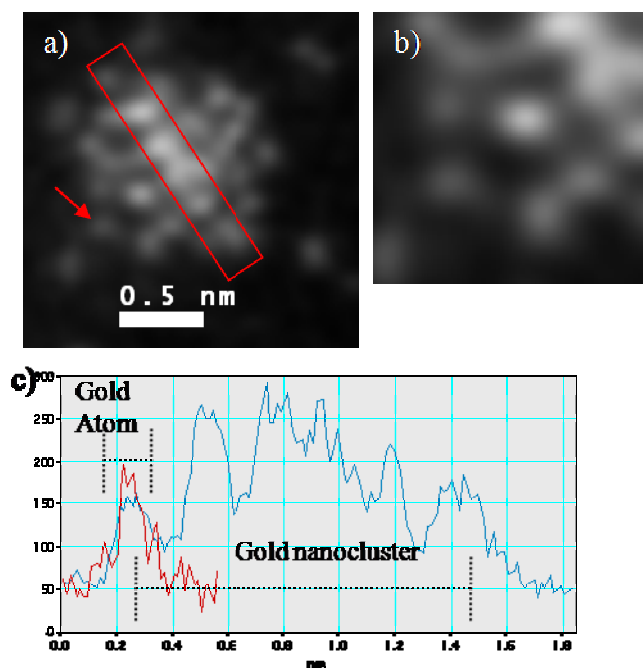

Figure 2 Filtered image (left) and raw data (right)

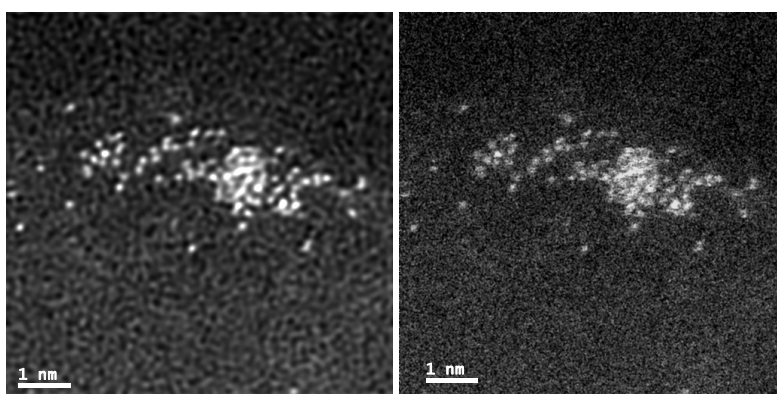

**Figure 3a** Filtered image (left) and raw data (right)

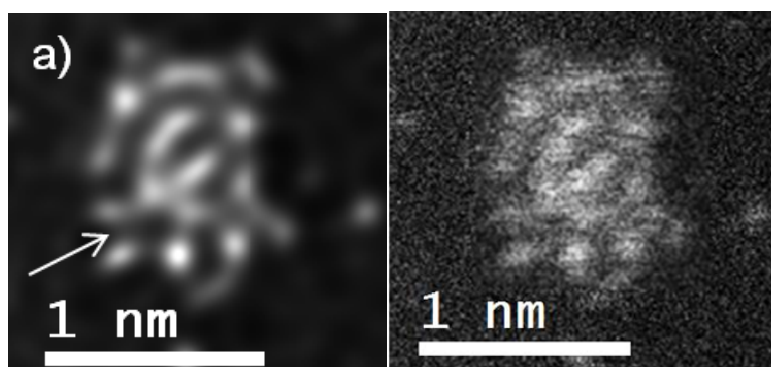

**Figure 3b** Raw data (left) and filtered image (right)

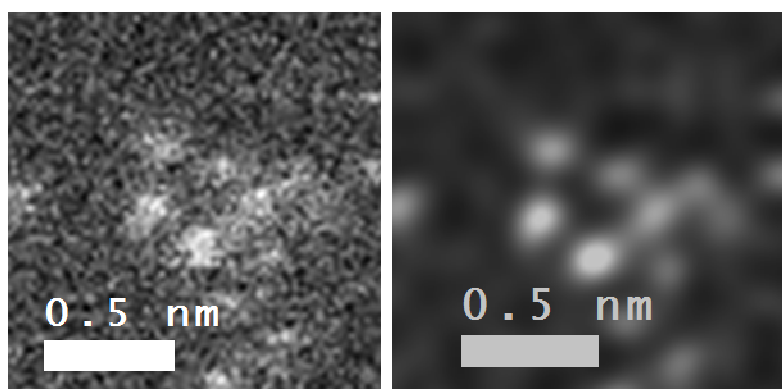

**Figure 4** Filtered image (left) and raw data (right)

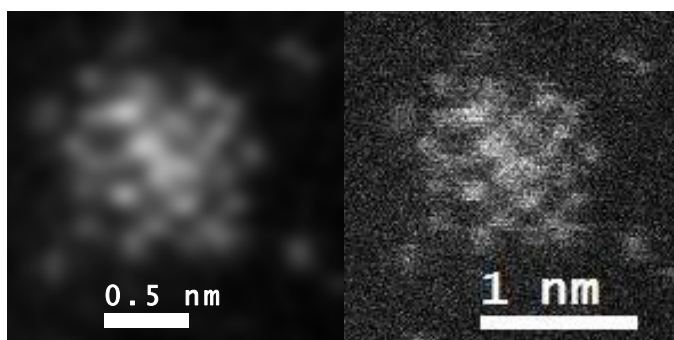

Supplement: c0cc02983a.pdf [file c0cc02983a.pdf]
